# Supplementary material
Source: publisher figshare collection journal article supplement (https://future-science-group.figshare.com/ndownloader/files/30774142)
Supplement: Supplementary file 1 [file 30774142]

# ISATUXIMAB IN THE TREATMENT OF RELAPSED/REFRACTORY MULTIPLE MYELOMA:

## A Review of Key Subgroup Analyses from the Phase 3 ICARIA-MM Study

**Authors:** Paul Richardson, Simon Harrison, Sara Brighen, Fredrik Schjesvold, Kwee Yong, Frank Campana, Solenn Le-Guenec, Sandrine Macé, Meletios Dimopoulos

**Article URL:** <https://www.futuremedicine.com/doi/10.2217/FON-2021-0568>

**Trial registration:** NCT02990338

© Paul G. Richardson

### ICARIA-MM study design and treatment

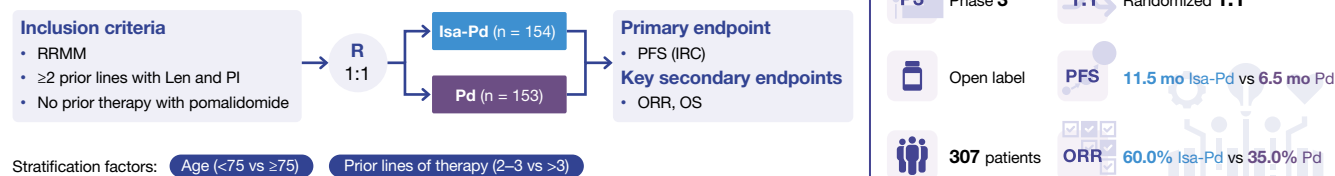

### Isa-Pd vs Pd Subgroup Analyses\*

#### Cytogenetic subgroups

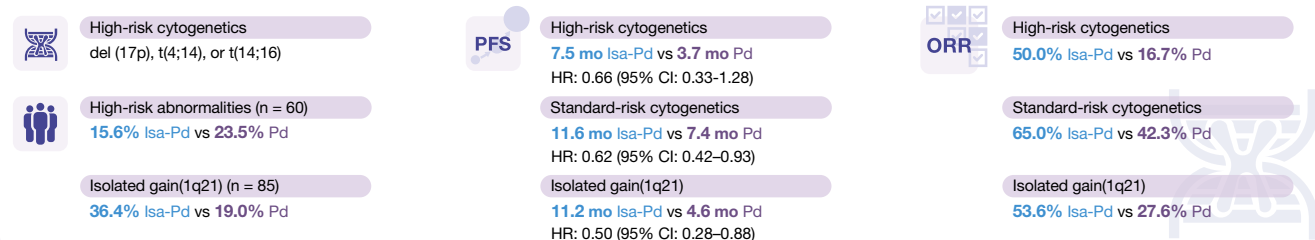

#### Renal impairment subgroup

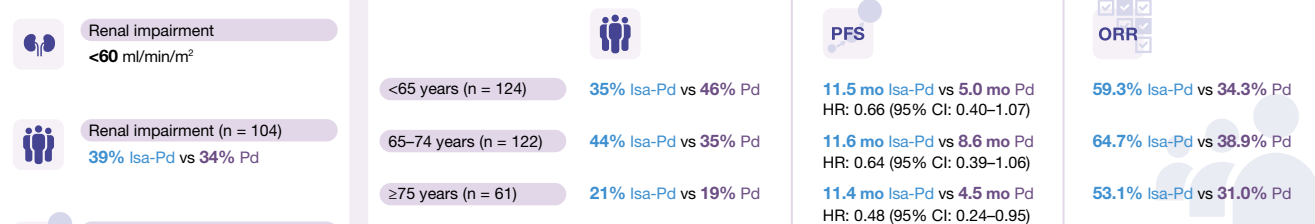

#### Refractory/prior lines subgroups

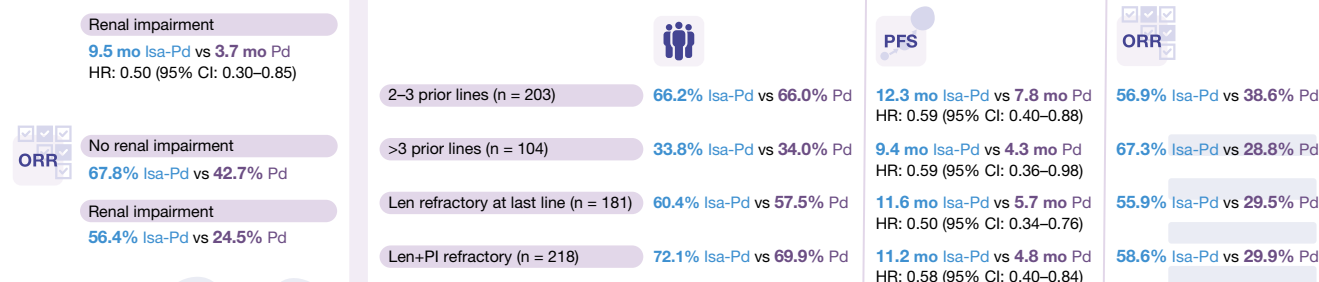

#### Conclusion

Overall, the addition of isatuximab to pomalidomide and dexamethasone improved PFS and disease response rates across different subgroups, regardless of prognostic factor

CRR, complete renal response; d, dexamethasone; IRC, independent review committee; Isa, isatuximab; Len, lenalidomide; mo, months; ORR, overall response rate; OS, overall survival; P, pomalidomide; PFS, progression-free survival; PI, proteasome inhibitor; R, randomized; RRMM, relapsed/refractory multiple myeloma

\*Subgroup analyses have the limitation of relatively small number of patients, thus, they are not powered for statistical analysis. However, the efficacy and safety benefits of adding isatuximab to pomalidomide and dexamethasone in the different subgroups of patients with RRMM were consistent with the overall ICARIA-MM study population
